# Supplementary material for: The Novel Structural Variation in the GHR Gene Is Associated with Growth Traits in Yaks (Bos grunniens)
Source: MDPI journal article supplement (doi:10.3390/ani13050851), 2023-02-26
Supplement: s1 [file s1]

**Supplementary Table S1.** The overall average of the growth parameters

| <b>Age</b>           | <b>Growth trait</b> | <b>Average</b> | <b>Maximum</b> | <b>Minimum</b> | <b>Standard<br/>Deviation</b> | <b>Coefficient<br/>of variation</b> |
|----------------------|---------------------|----------------|----------------|----------------|-------------------------------|-------------------------------------|
| 6 months<br>(n=315)  | Body weight         | 84.18          | 117            | 58             | 10.30                         | 12.24%                              |
|                      | Body length         | 94.47          | 108            | 82             | 5.19                          | 5.50%                               |
|                      | Body height         | 91.95          | 116            | 73             | 7.40                          | 8.05%                               |
|                      | Chest girth         | 123.99         | 144            | 100            | 7.82                          | 6.31%                               |
| 12 months<br>(n=315) | Body weight         | 82.61          | 113            | 48             | 10.56                         | 12.78%                              |
|                      | Body length         | 90.52          | 102            | 81             | 4.17                          | 4.61%                               |
|                      | Body height         | 95.94          | 113            | 80             | 4.97                          | 5.18%                               |
|                      | Chest girth         | 117.15         | 134            | 102            | 5.09                          | 4.35%                               |
| 18 months<br>(n=226) | Body weight         | 122.39         | 168            | 76             | 13.01                         | 10.63%                              |
|                      | Body length         | 101.88         | 124            | 80             | 6.02                          | 5.91%                               |
|                      | Body height         | 101.64         | 120            | 85             | 5.79                          | 5.69%                               |
|                      | Chest girth         | 138.33         | 182            | 107            | 10.15                         | 7.34%                               |
| 30 months<br>(n=180) | Body weight         | 155.42         | 203            | 108            | 15.23                         | 9.80%                               |
|                      | Body length         | 99.55          | 117            | 90             | 5.00                          | 5.02%                               |
|                      | Body height         | 113.17         | 126            | 96             | 5.70                          | 5.03%                               |
|                      | Chest girth         | 146.97         | 173            | 122            | 8.27                          | 5.62%                               |

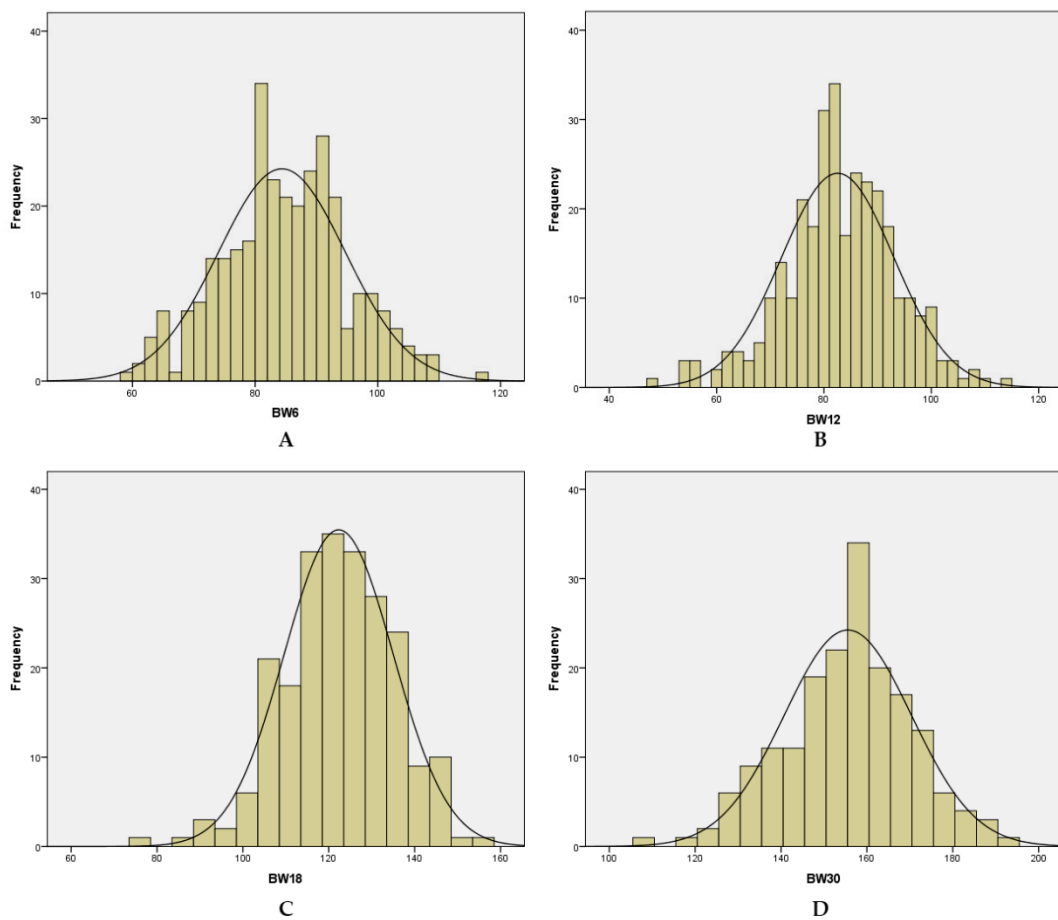

Figure S1: Histogram of normal distribution of body weight frequency of yaks at different ages.

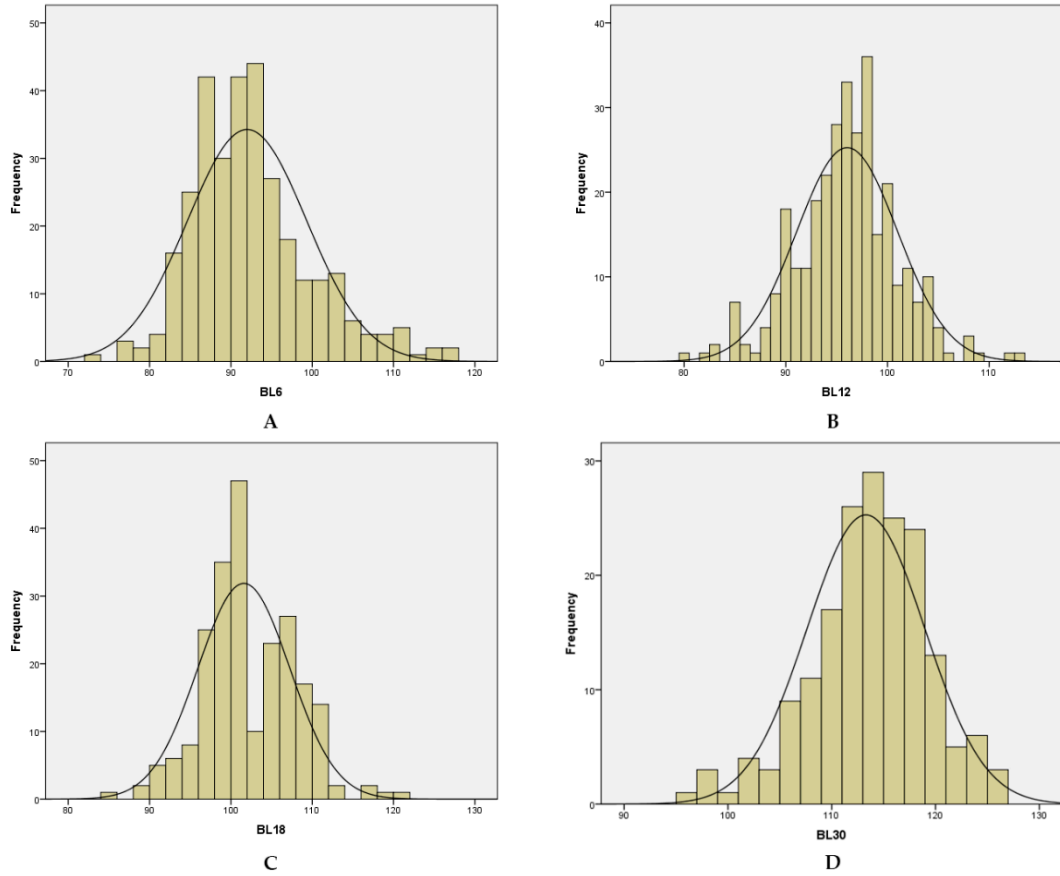

Figure S2: Histogram of normal distribution of yak body length frequency at different months.

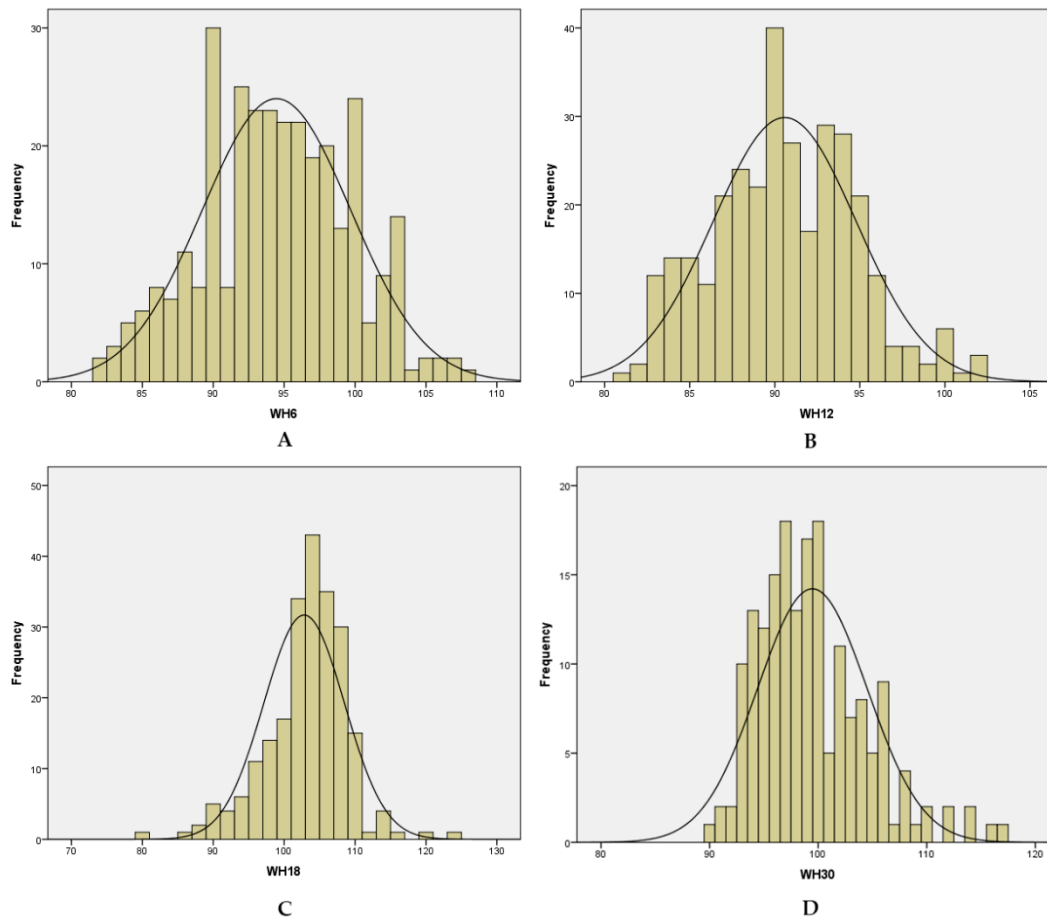

Figure S3: Histogram of normal distribution of yak body height frequency at different months.

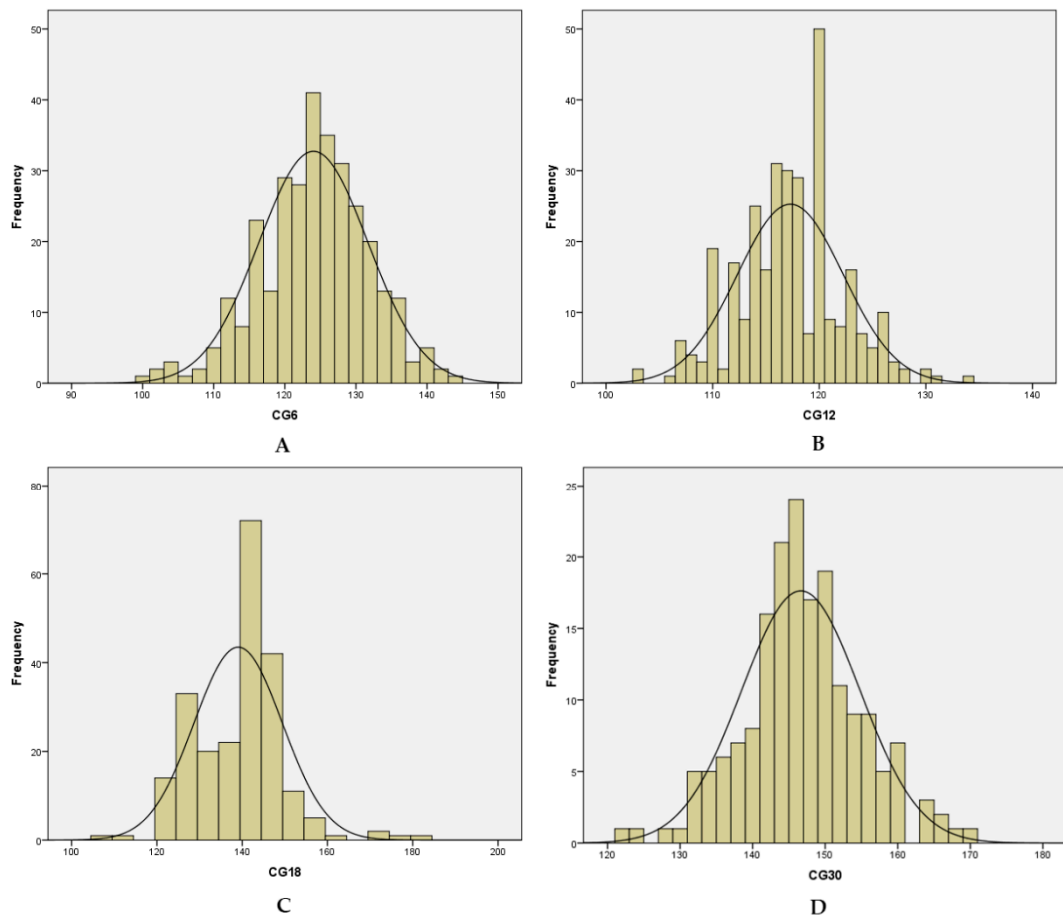

Figure S4: Histogram of normal distribution of chest girth frequency of yaks at different ages.
